# Supplementary figures and images for: Notch-mediated induction of N-cadherin and α9-integrin confers higher invasive phenotype on rhabdomyosarcoma cells
Source: PubMed Central journal article supplement — Br J Cancer. 2012 Sep 13;107(8):1374–83. doi: 10.1038/bjc.2012.411 (PMC3494428; doi:10.1038/bjc.2012.411), 2012-09-13

**A**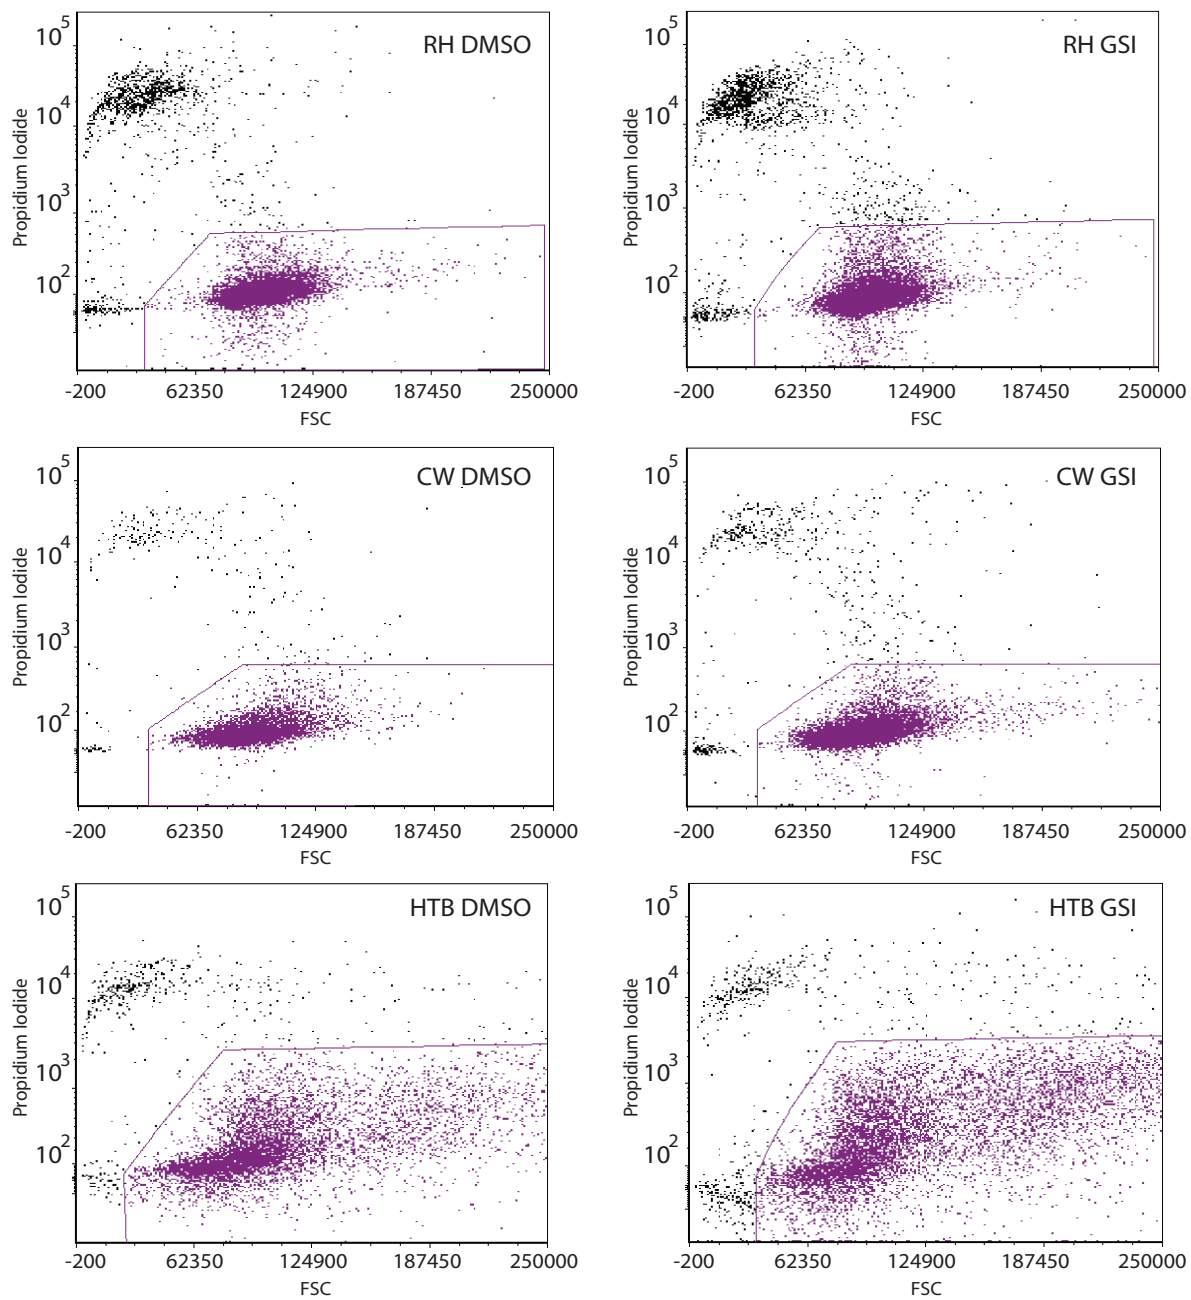**B**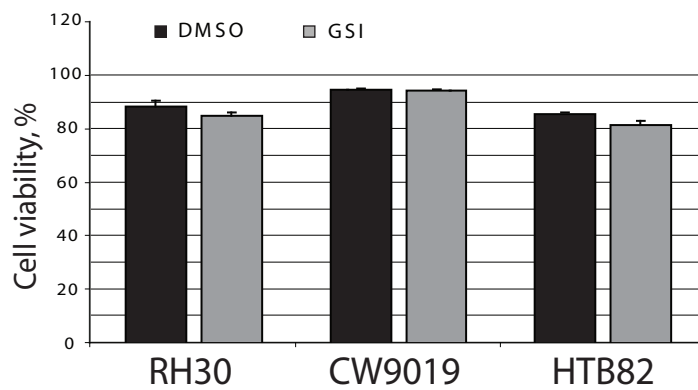

Figure S1

Supplement: bjc2012411x1.pdf [file bjc2012411x1.pdf]
